# Supplementary material
Source: Springer Nature journal article supplement (https://www.springermedizin.de/resource/supplementary/12955_2013_1166_MOESM1_ESM.pdf/9558930)
Supplement: MOESM1 [file 9558930]

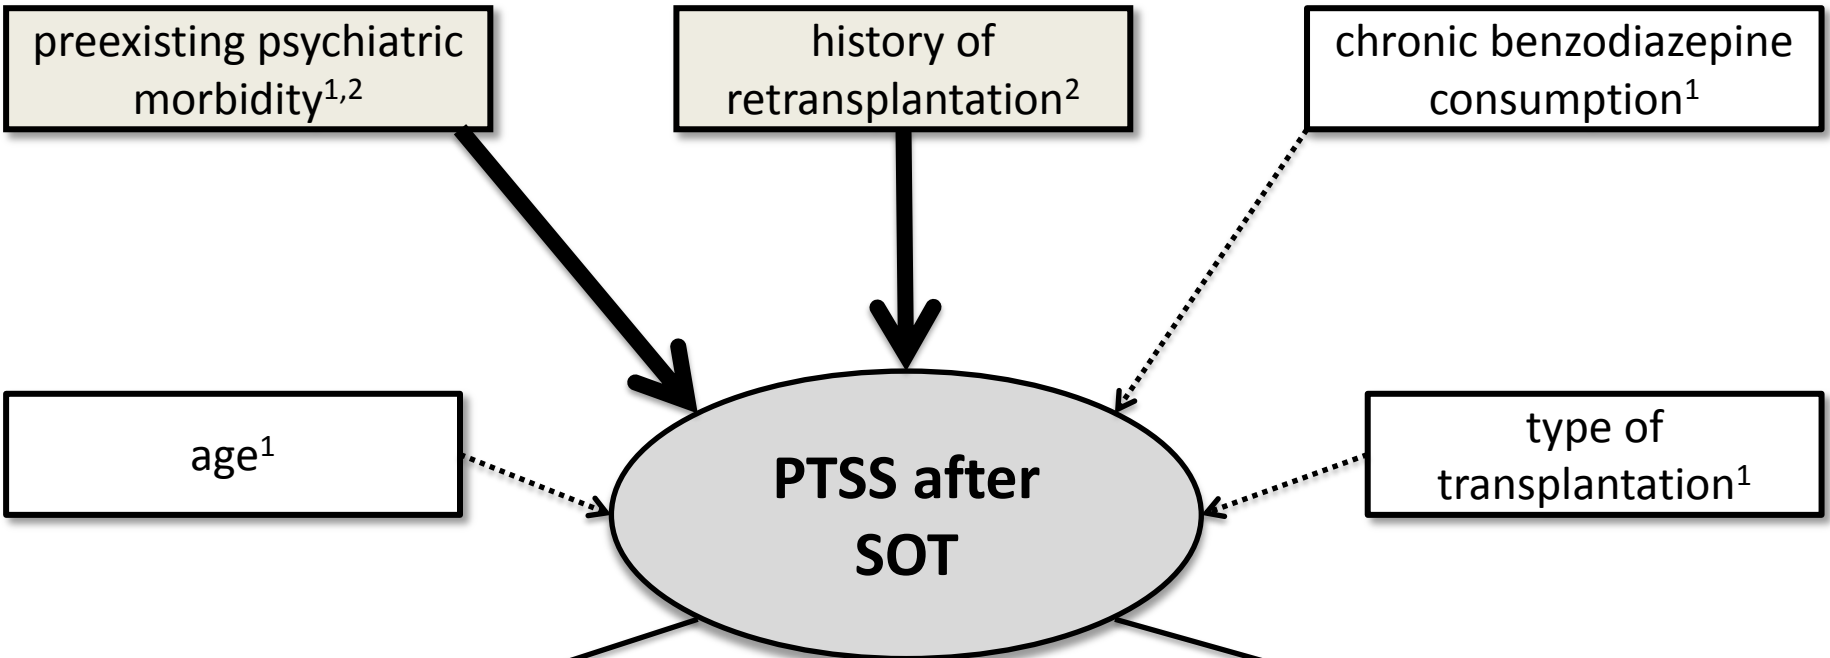

|                              |                                     |   |
|------------------------------|-------------------------------------|---|
| SF-36                        | physical functioning <sup>1,2</sup> | ↓ |
|                              | role physical <sup>1,2</sup>        |   |
|                              | pain <sup>1,2</sup>                 |   |
|                              | general health <sup>1,2</sup>       |   |
|                              | vitality <sup>1,2</sup>             |   |
|                              | social functioning <sup>1,2</sup>   |   |
|                              | role emotional <sup>1,2</sup>       |   |
| mental health <sup>1,2</sup> |                                     |   |

|                                      |                                               |   |
|--------------------------------------|-----------------------------------------------|---|
| FLZ- life satisfaction questionnaire | Life satisfaction – Global Score <sup>1</sup> | ↓ |
|                                      | health <sup>1</sup>                           |   |
|                                      | occupation work <sup>2</sup>                  |   |
|                                      | character/own skills <sup>1</sup>             |   |

Legend: <sup>1</sup> univariat testing significant; <sup>2</sup> multiple regression
